# Supplementary material for: Morinda officinalis Polysaccharides Ameliorates Bone Growth by Attenuating Oxidative Stress and Regulating the Gut Microbiota in Thiram-Induced Tibial Dyschondroplasia Chickens
Source: MDPI journal article supplement (doi:10.3390/metabo12100958), 2022-10-10
Supplement: s1 [file s1]

***Morinda officinalis* polysaccharides ameliorate bone growth by  
attenuating oxidative stress and regulating the gut microbiota in  
thiram-induced tibial dyschondroplasia chickens**

**Table S1.** Primers used for the RT-qPCR

| Genes     | Accession<br>number | Primer sequence (50-30)                                 | Product size<br>(bp) |
|-----------|---------------------|---------------------------------------------------------|----------------------|
| GAPD<br>H | NM_204305.1         | F: GCCCAGAACATCATCCCA<br>R: CGGCAGGTCAGGTCAACA          | 137                  |
| BMP-2     | XM_015283435.1      | F: TCAGCTCAGGCCGTTGTTAG<br>R: ACCCCACGTCATTGAAGTCC      | 185                  |
| Runx2     | AF_445419           | F: TAAAGGTGACGGTGGATGG<br>R: TGTGGATTAAAAGGACTTGGTG     | 190                  |
| Smad4     | XM_040690690.1      | F: CGACCTGCACAAAAACGAACTGAA<br>R: GCAGACGCTGTCGTATTTGAG | 107                  |
| SOD       | NM_205064.1         | F: CCGGCTTGTCTGATGGAGAT<br>R: TGCATCTTTTGGTCCACCGT      | 125                  |
| GPX-1     | NM_001277853.2      | F: ACGGCGCATCTTCCAAAG<br>R: TGTTCCCCCAACCATTCTC         | 73                   |

Note: F. Forward primer; R. Reverse primer.;
